# Supplementary material for: Electronic clinical decision support tool for assessing stomach symptoms in primary care (ECASS): a feasibility study
Source: PubMed Central journal article supplement (PMC7978254; doi:10.1136/bmjopen-2020-041795), 2021-03-18
Supplement: bmjopen-2020-041795supp001.pdf [file bmjopen-2020-041795supp001.pdf]

**Data items: ECASS**

Age

Sex

Date of first GP consultation

Dates of subsequent GP consultations prior to referral

Referral in episode of care – Y/N

Type of referral (2 week wait; open access oesophagogastrroduodenoscopy; routine out-patient; emergency; other)

Date of referral

Co-morbidities

eCDS tool used Y/N

Date used

Final diagnosis

Date of diagnosis

Cancer stage
